# Supplementary material for: Assessing the Anthelmintic Candidates BLK127 and HBK4 for Their Efficacy on Haemonchus contortus Adults and Eggs, and Their Hepatotoxicity and Biotransformation
Source: MDPI journal article supplement (doi:10.3390/pharmaceutics14040754), 2022-03-30
Supplement: s1 [file s1]

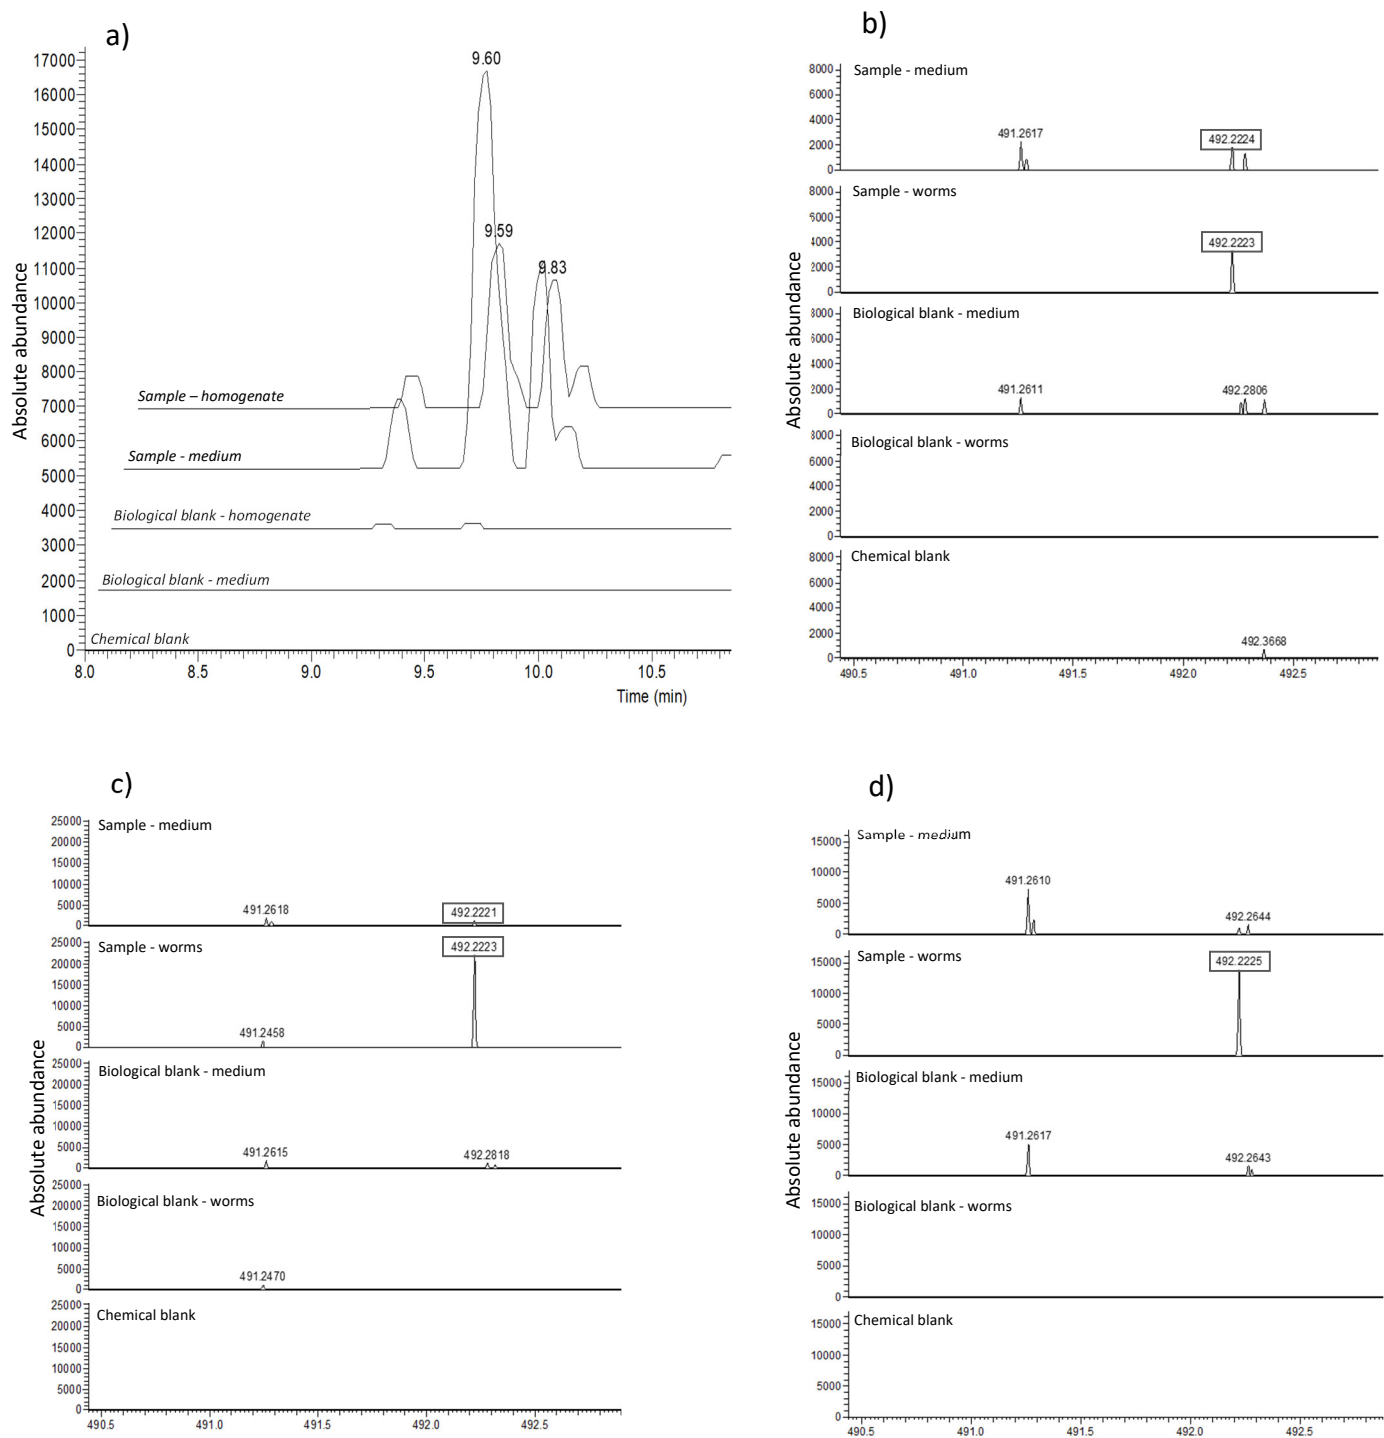

**Figure S1: UHPLC chromatograms and comparison of HRMS spectra in the samples and blank samples of BLK127-O-glc.** **(a)** Comparison of extracted ion UHPLC-HRMS chromatograms for  $m/z$  492.2224  $[M-H]^+$  (BLK127-O-glc) from *H. contortus* (IRE strain, female) incubated with BLK127 (*sample-homogenate* and *sample-medium*), blank biological samples (*biological blank-worms* and *biological blank-medium*) and *chemical blank*. **(b)** Comparison of full HRMS spectra in the samples and blank samples in  $t_R$  9.20 min. **(c)** Comparison of full HRMS spectra in the samples and blank samples in  $t_R$  9.60 min. **(d)** Comparison of full HRMS spectra in the samples and blank samples in  $t_R$  9.83 min.
