# Supplementary material for: Assessing the Anthelmintic Candidates BLK127 and HBK4 for Their Efficacy on Haemonchus contortus Adults and Eggs, and Their Hepatotoxicity and Biotransformation
Source: MDPI journal article supplement (doi:10.3390/pharmaceutics14040754), 2022-03-30
Supplement: s1 [file s1]

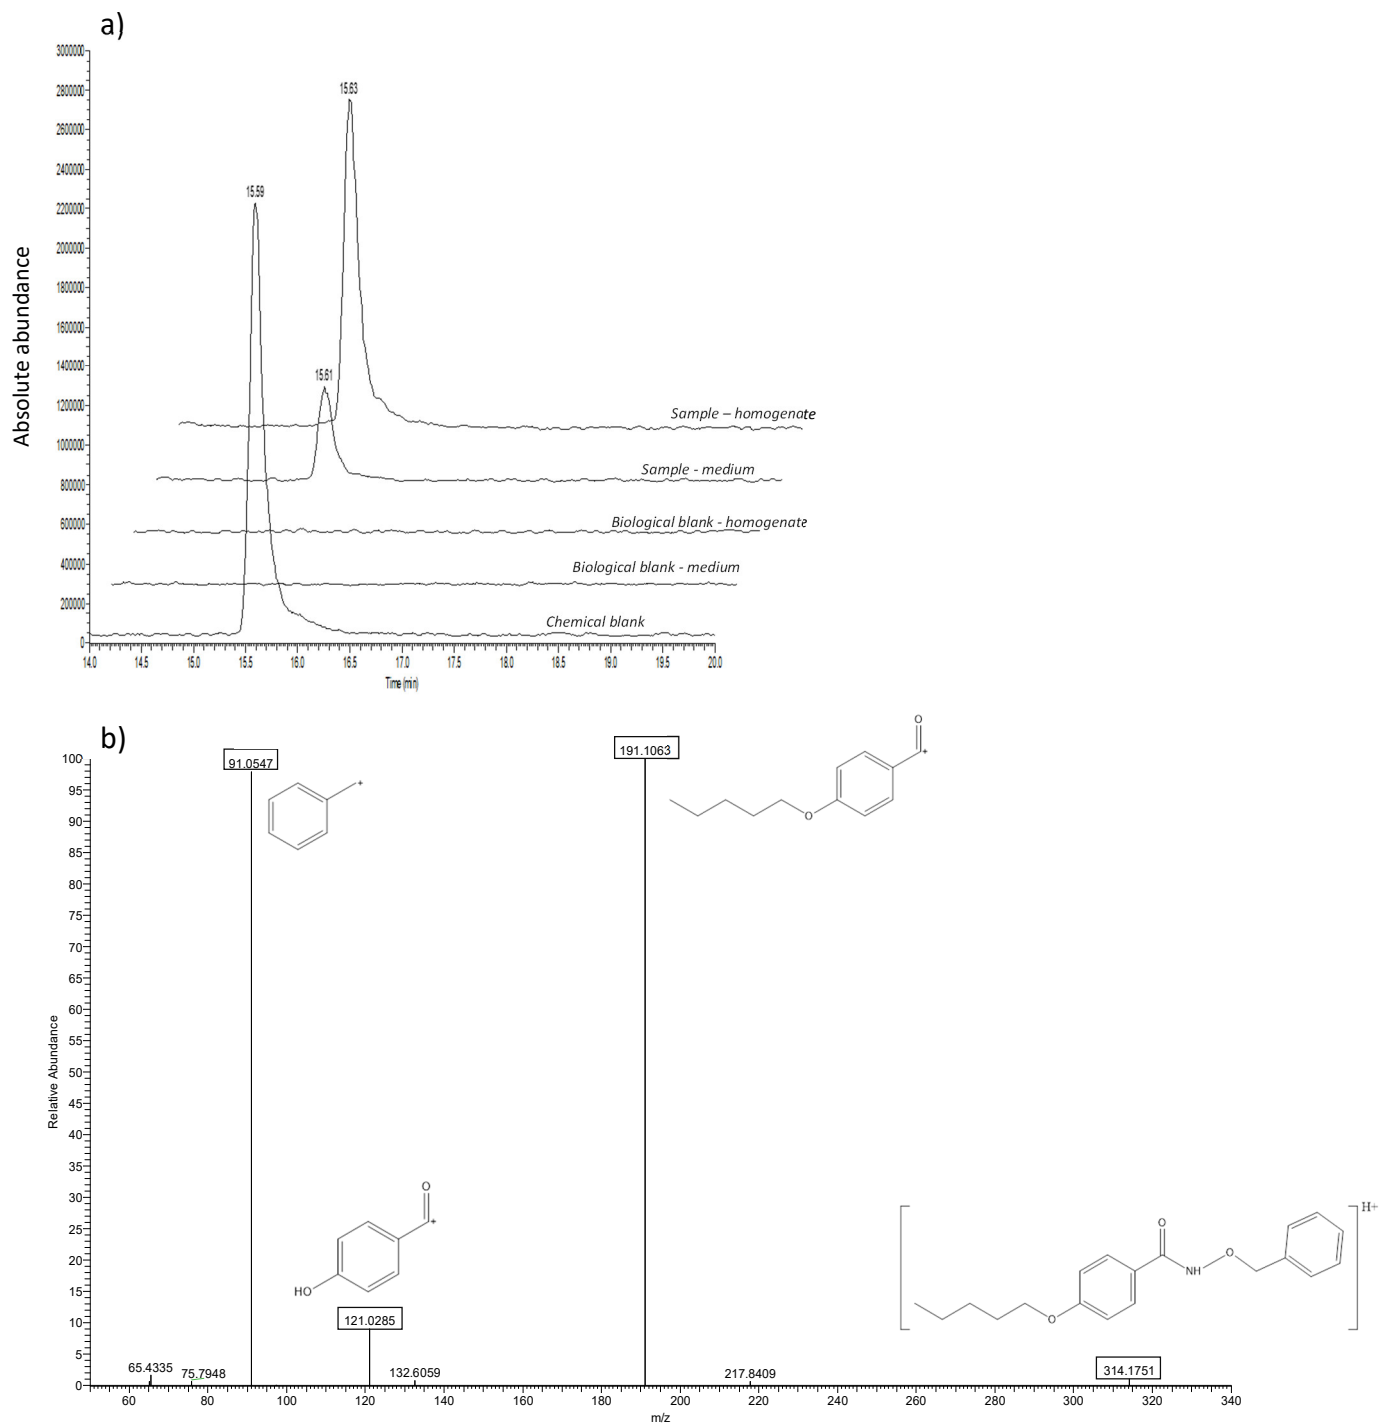

**Figure S1: UHPLC chromatograms and HRMS/MS spectrum of BLK127. (a)** Comparison of extracted ion UHPLC-HRMS chromatograms for  $m/z$  314.1571  $[M-H]^+$  (BLK127) from *H. contortus* (IRE female) incubated with BLK127 (sample-homogenate and sample-medium), blank biological samples (biological blank-homogenate and biological blank-medium) and chemical blank. **(b)** HRMS/MS spectrum of BLK127 from sample-homogenate with proposed structures of the main fragments.
