# Supplementary material for: Assessing the Anthelmintic Candidates BLK127 and HBK4 for Their Efficacy on Haemonchus contortus Adults and Eggs, and Their Hepatotoxicity and Biotransformation
Source: MDPI journal article supplement (doi:10.3390/pharmaceutics14040754), 2022-03-30
Supplement: s1 [file s1]

a)

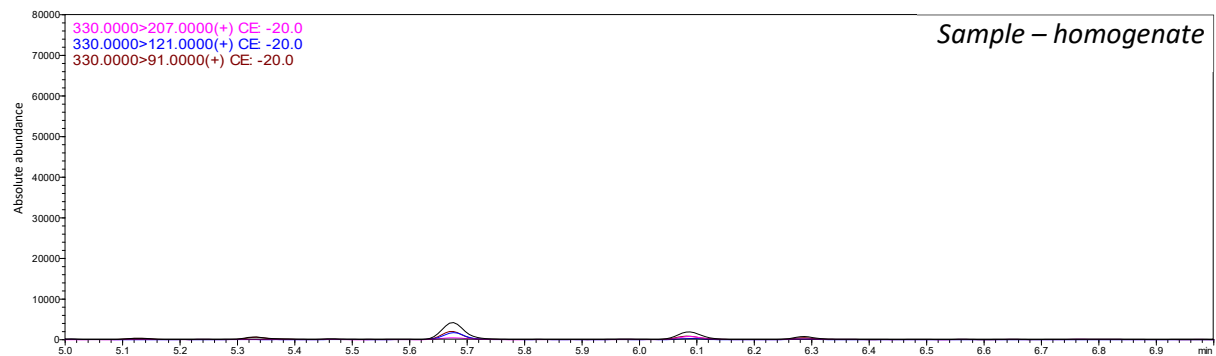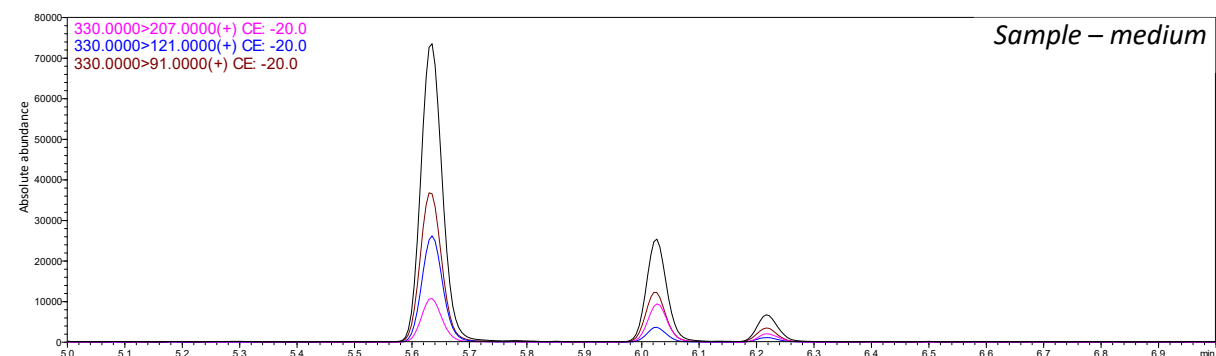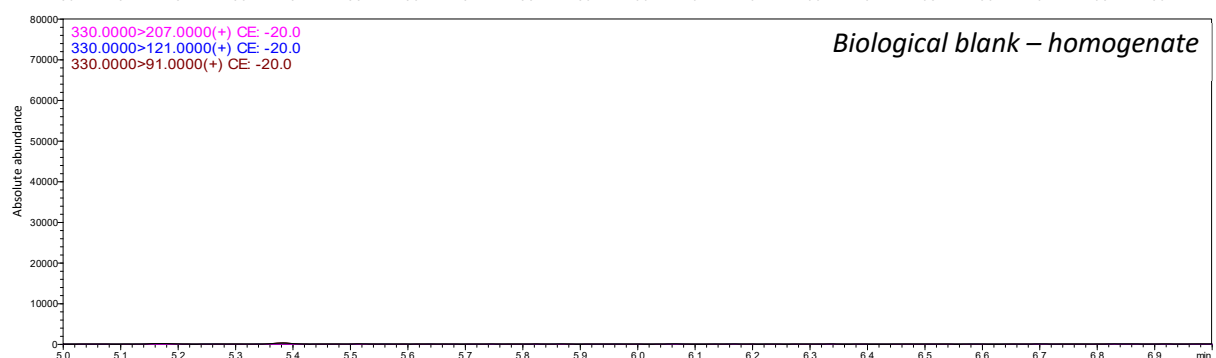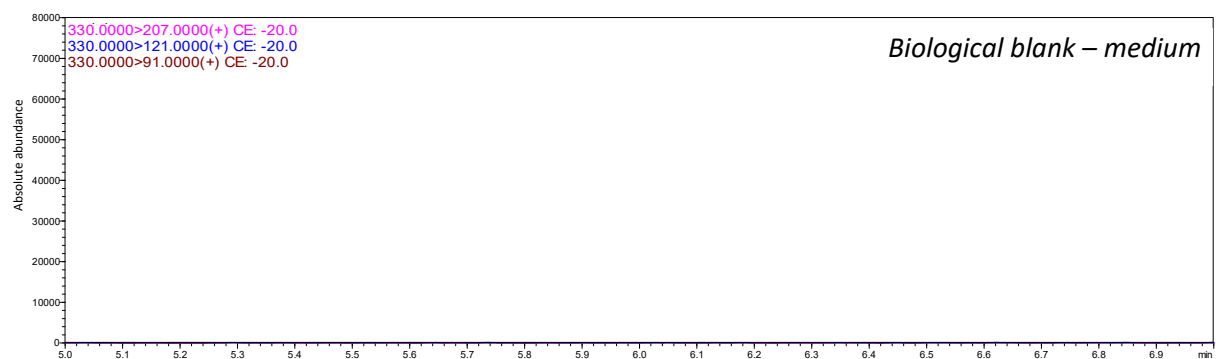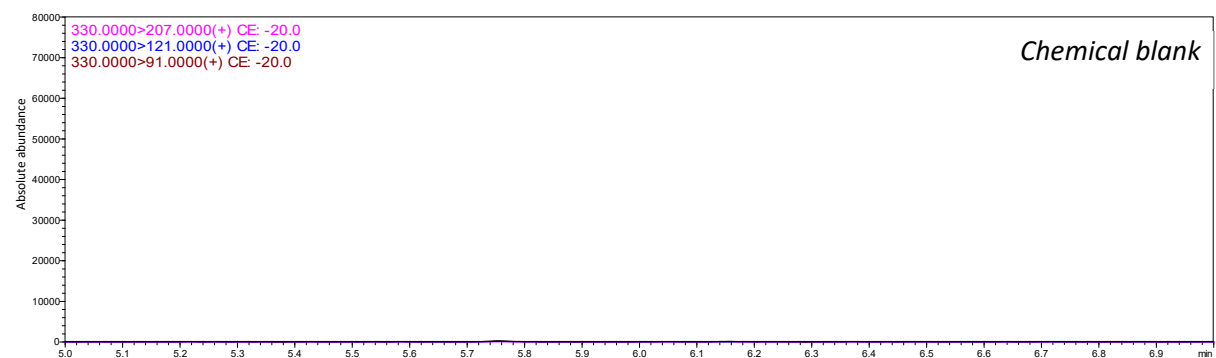

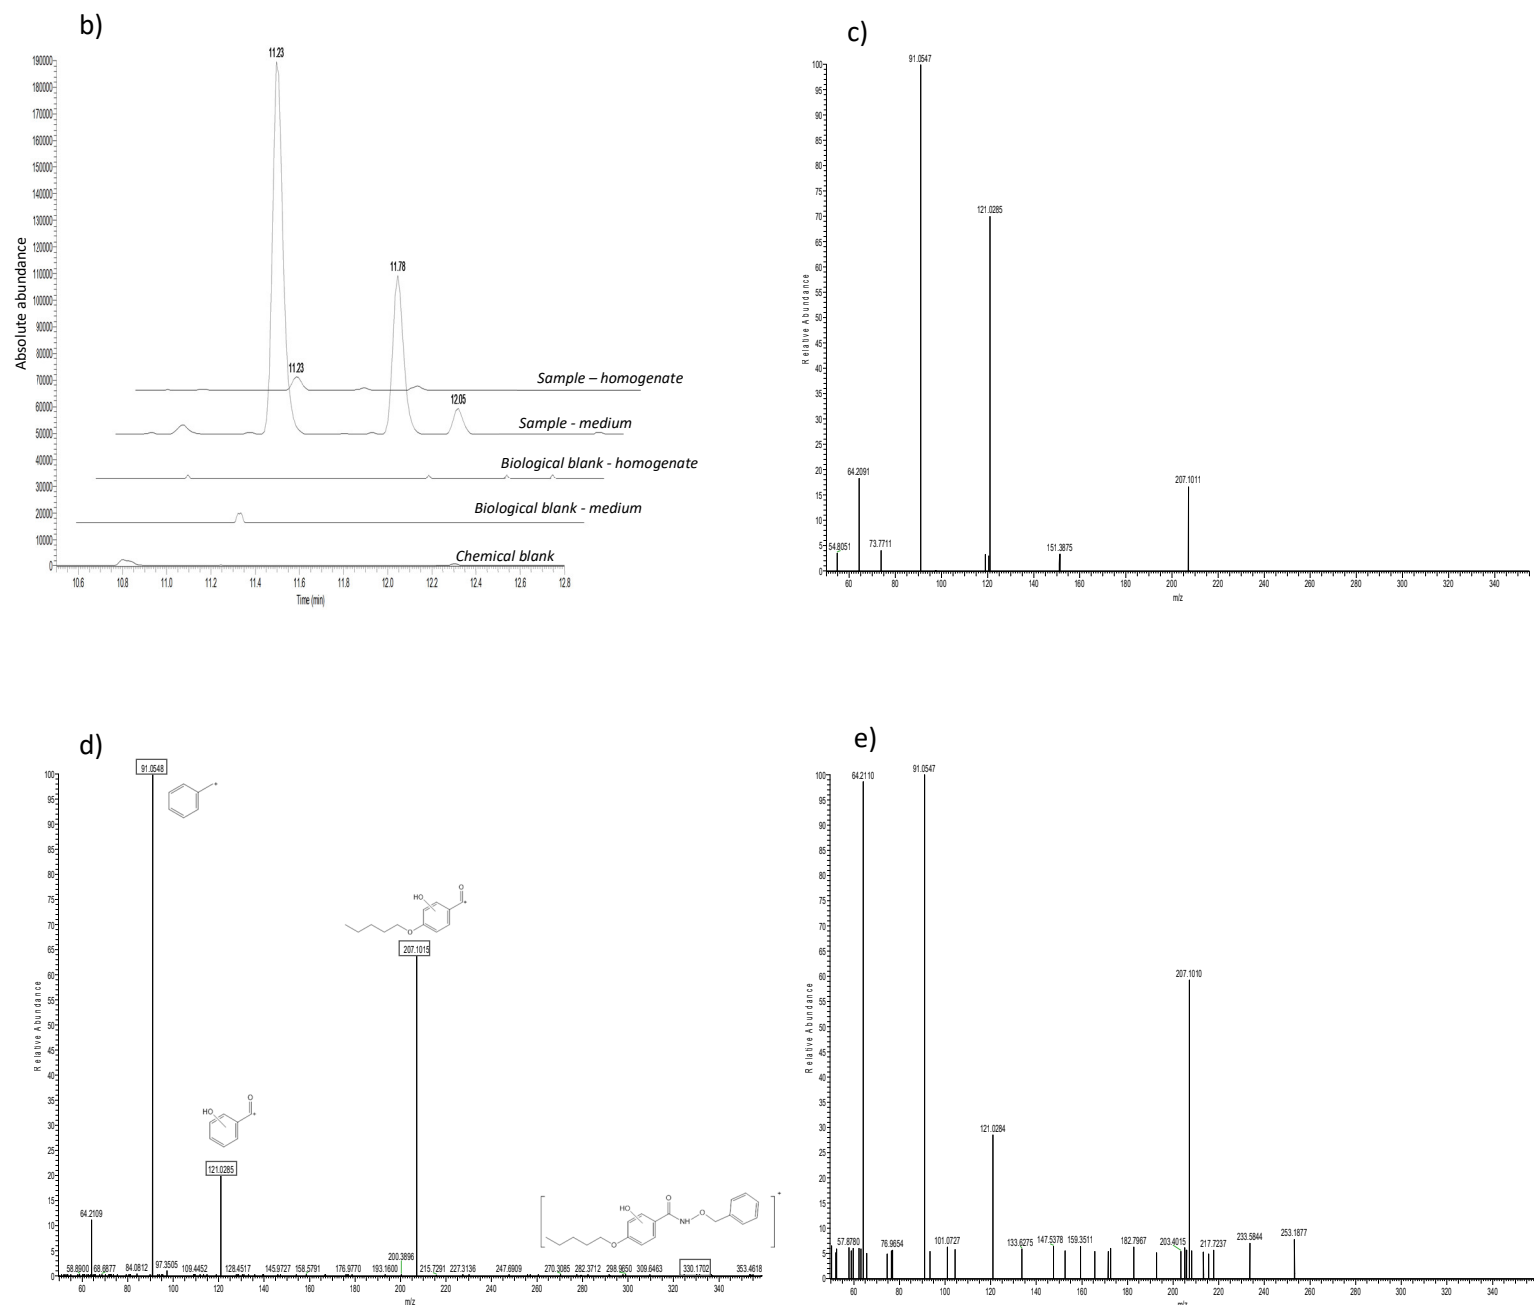

**Figure S4: UHPLC chromatograms and HRMS/MS spectra of BLK127-OH.** **(a)** Representative UHPLC-MS/MS chromatograms of BLK127-OH with MRM\* in the samples incubated with BLK127 (*sample-homogenate* and *sample-medium*), blank biological samples (*biological blank-homogenate* and *biological blank-medium*) and *chemical blank*. **(b)** Comparison of extracted ion UHPLC-HRMS chromatograms for  $m/z$  330.1702  $[M-H]^+$  (BLK127-OH) from *H. contortus* (IRE strain female) in the samples and blank samples. **(c)** HRMS/MS spectrum of BLK127-OH in  $t_R$  11.23 min. **(d)** HRMS/MS spectrum of BLK127-OH in  $t_R$  11.78 min with the proposed structures of the main fragments. **(e)** HRMS/MS spectrum of BLK127-OH in  $t_R$  12.05 min.

\* multiple reaction monitoring
