# Supplementary material for: Assessing the Anthelmintic Candidates BLK127 and HBK4 for Their Efficacy on Haemonchus contortus Adults and Eggs, and Their Hepatotoxicity and Biotransformation
Source: MDPI journal article supplement (doi:10.3390/pharmaceutics14040754), 2022-03-30
Supplement: s1 [file s1]

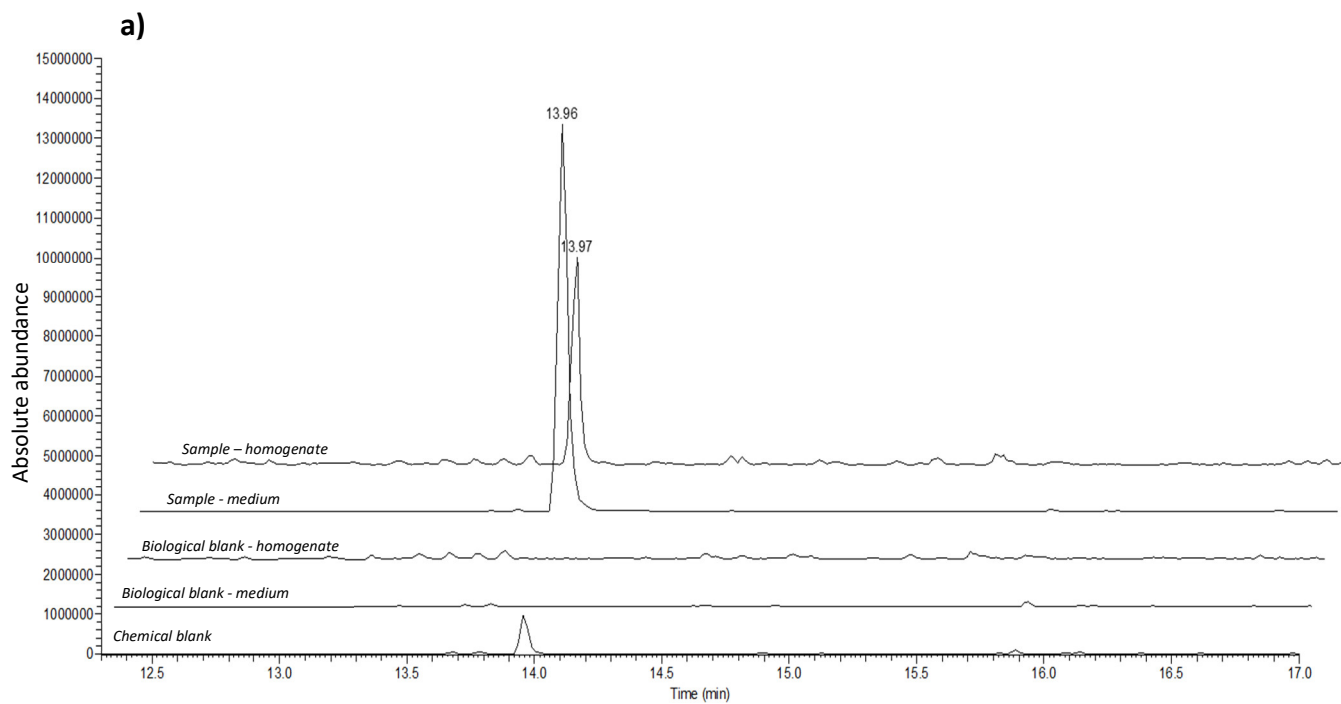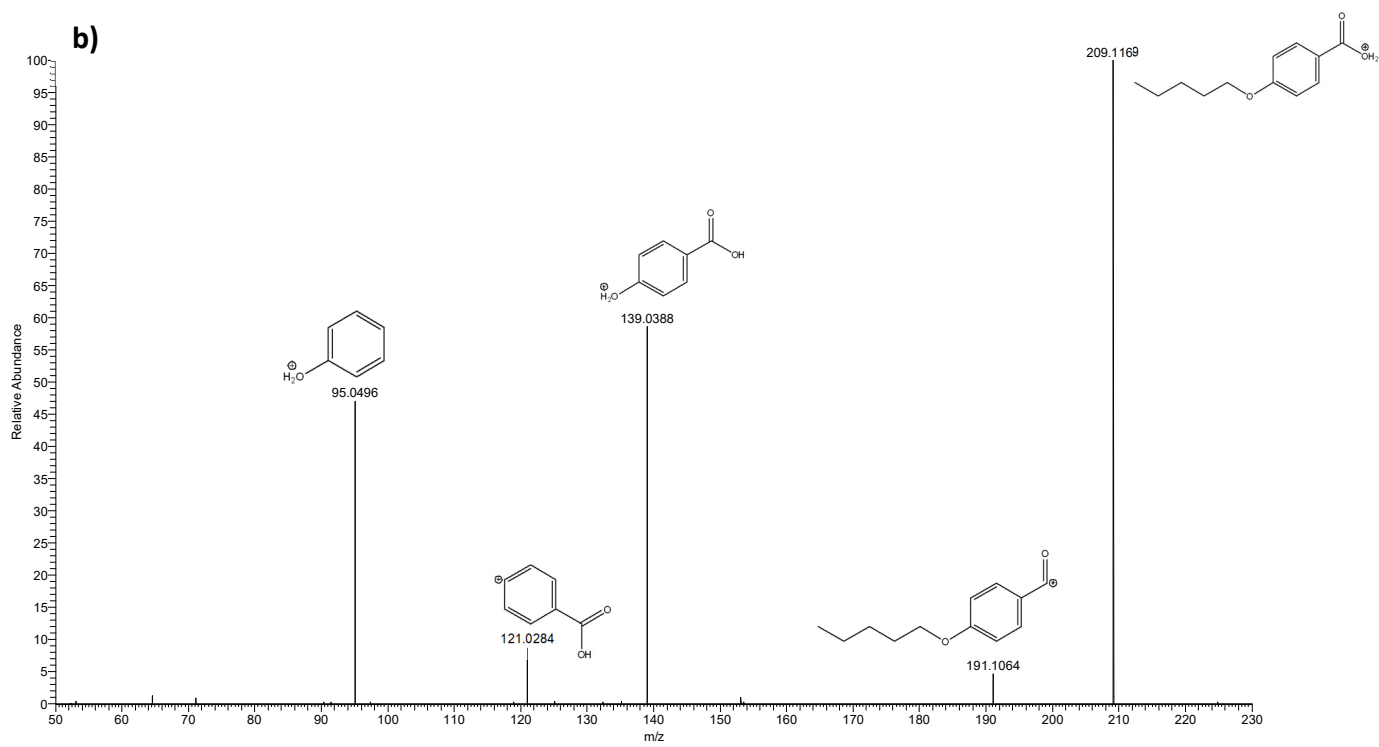

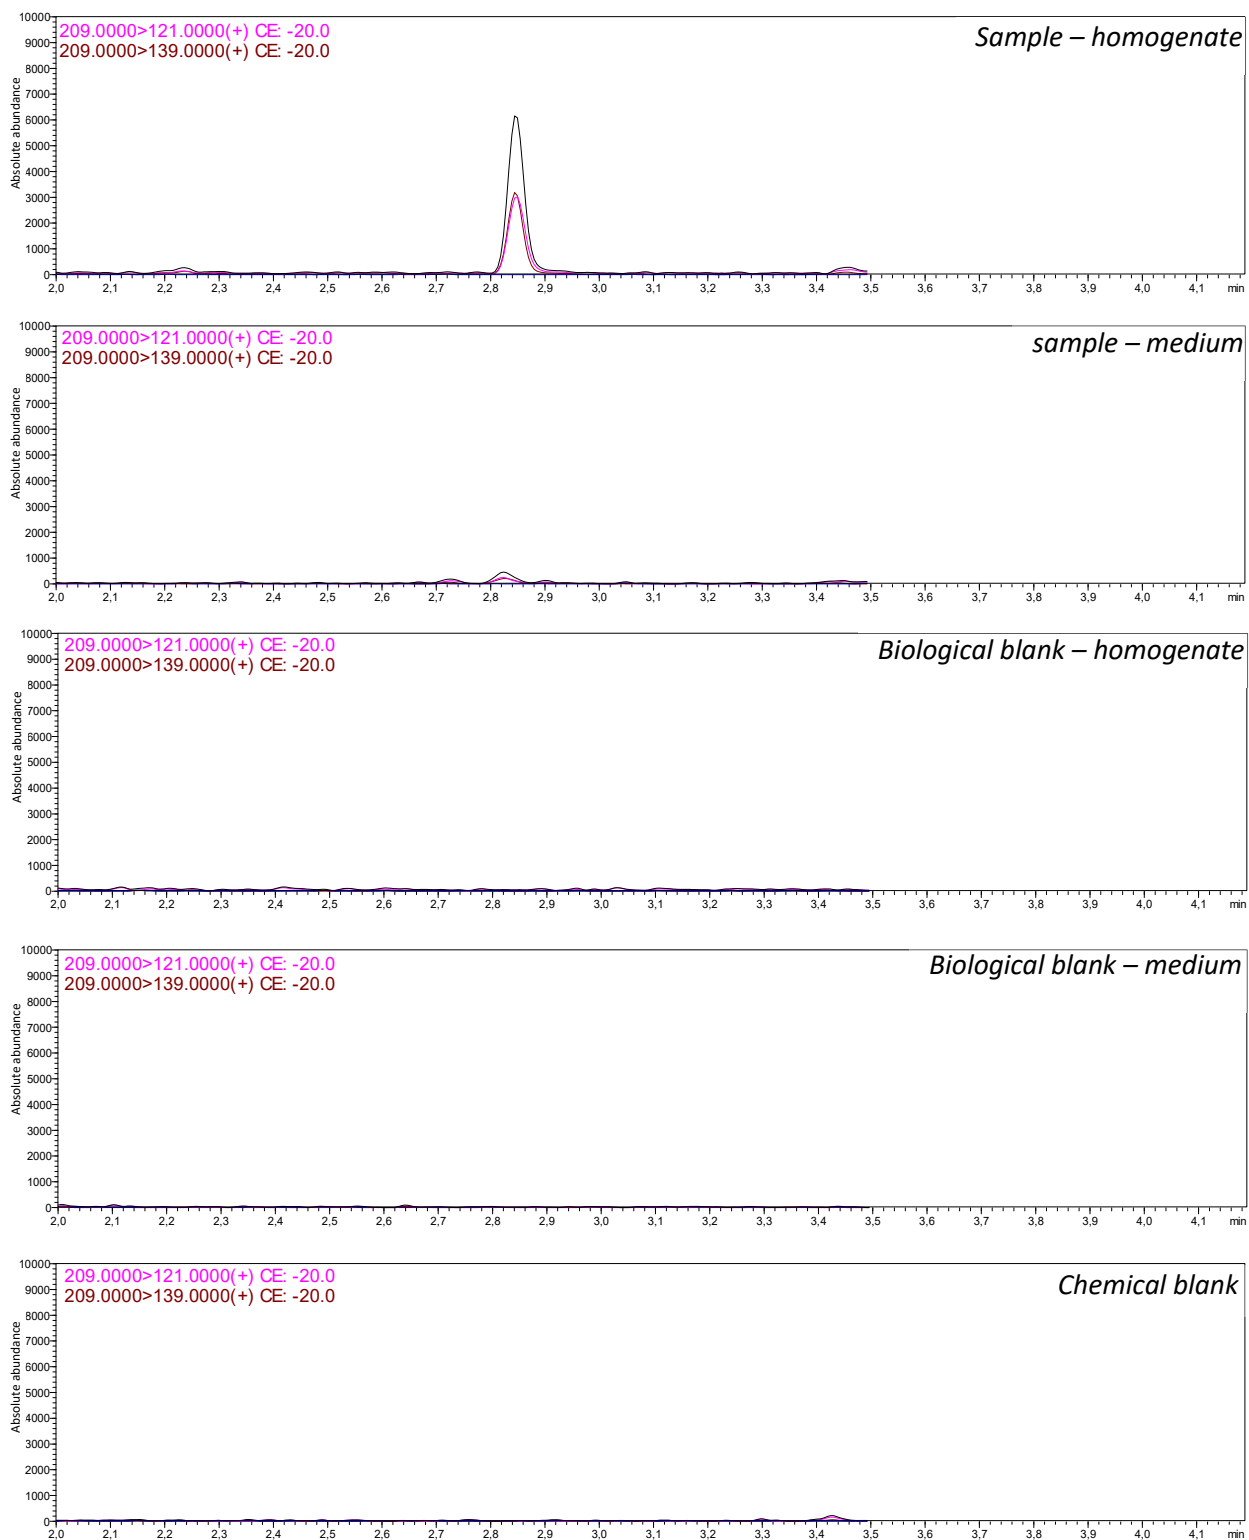

**Figure S3: UHPLC chromatograms and HRMS/MS spectrum of h-BLK127.** (a) Comparison of extracted ion UHPLC-HRMS chromatograms for  $m/z$  209.1169  $[M-H]^+$  (h-BLK127) from *H. contortus* (IRE female) incubated with BLK127 (*sample–homogenate* and *sample–medium*), blank biological samples (*biological blank–homogenate* and *biological blank–medium*) and *chemical blank*. (b) HRMS/MS spectrum of h-BLK127 from *sample–homogenate* with proposed structures of the main fragments. (c) Representative UHPLC-MS/MS chromatograms of h-BLK127 in the samples and blank samples with MRM\*.

\* multiple reaction monitoring
