# Supplementary material for: Assessing the Anthelmintic Candidates BLK127 and HBK4 for Their Efficacy on Haemonchus contortus Adults and Eggs, and Their Hepatotoxicity and Biotransformation
Source: MDPI journal article supplement (doi:10.3390/pharmaceutics14040754), 2022-03-30
Supplement: s1 [file s1]

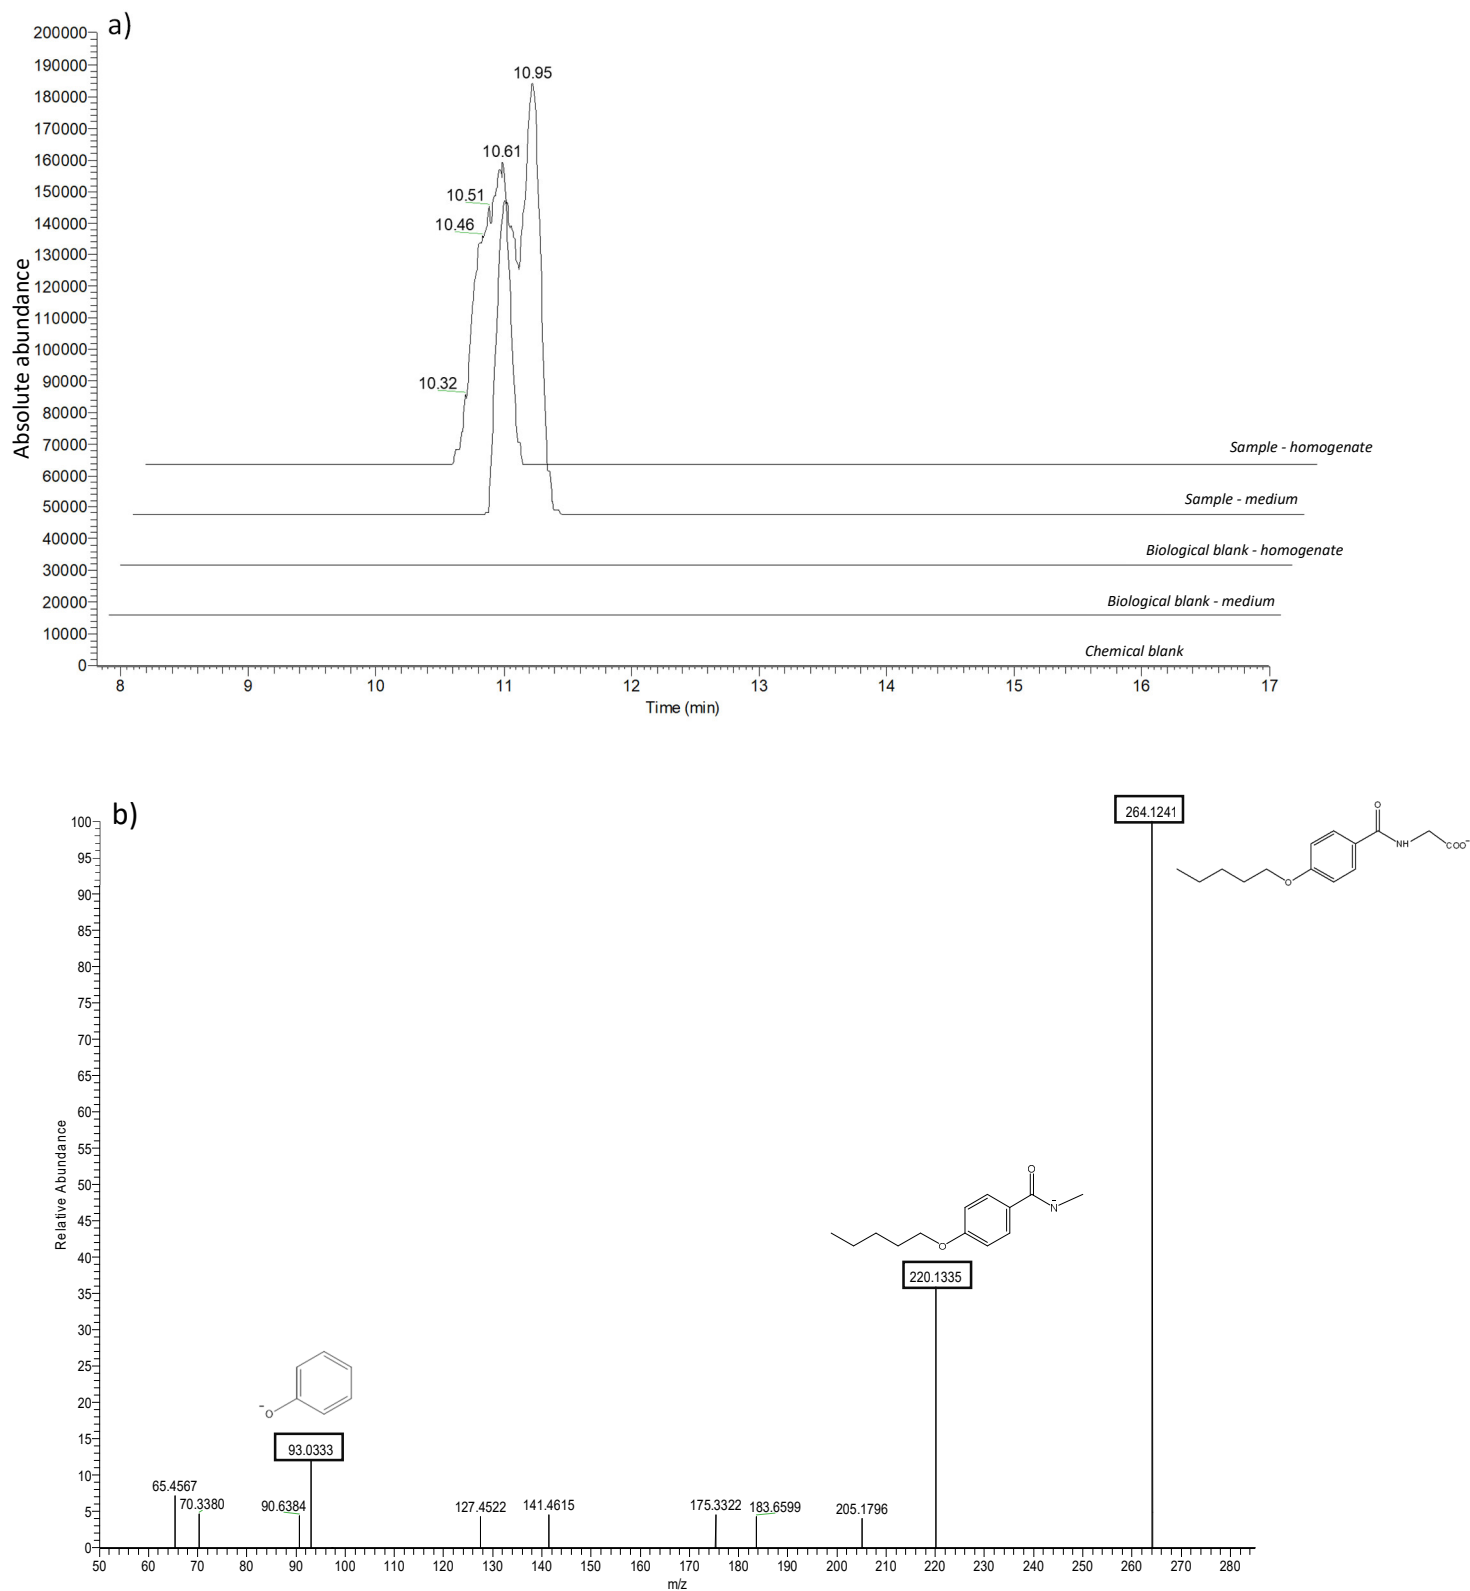

**Figure S6: UHPLC chromatograms and HRMS/MS spectrum of h-BLK-gly. (a)** Comparison of extracted ion UHPLC-HRMS chromatograms for  $m/z$  264.1246  $[M-H]^-$  (h-BLK-gly) from isolated hepatocytes incubated with BLK127 (*sample-homogenate* and *sample-medium*), blank biological samples (*biological blank-homogenate* and *biological blank-medium*) and *chemical blank*. **(b)** HRMS/MS spectrum of BLK127-gly from the *sample-homogenate* with proposed structures of the main fragments.
