# Supplementary material for: Assessing the Anthelmintic Candidates BLK127 and HBK4 for Their Efficacy on Haemonchus contortus Adults and Eggs, and Their Hepatotoxicity and Biotransformation
Source: MDPI journal article supplement (doi:10.3390/pharmaceutics14040754), 2022-03-30
Supplement: s1 [file s1]

a)

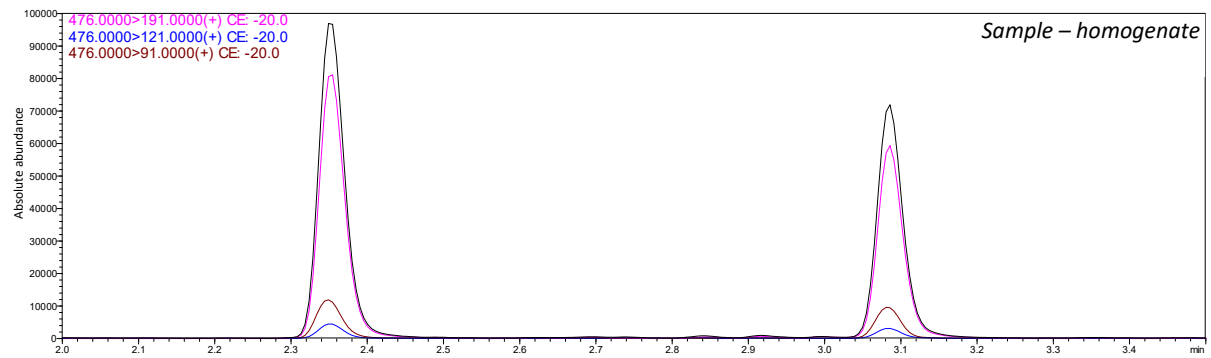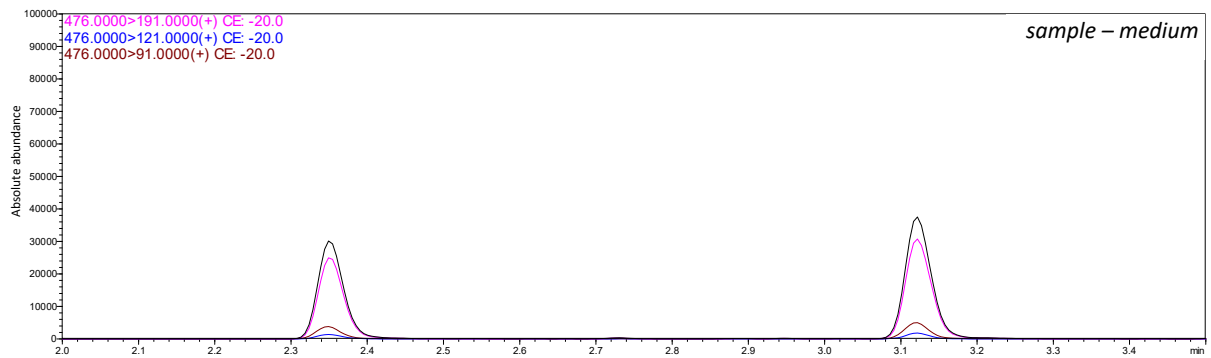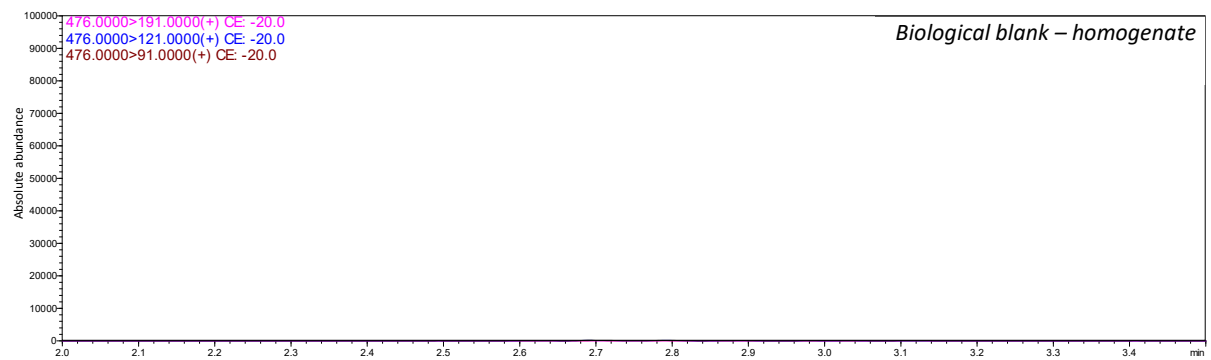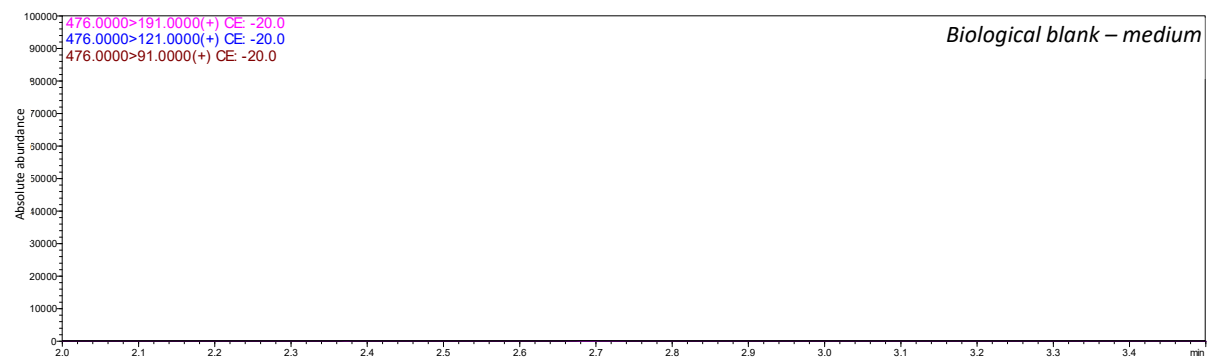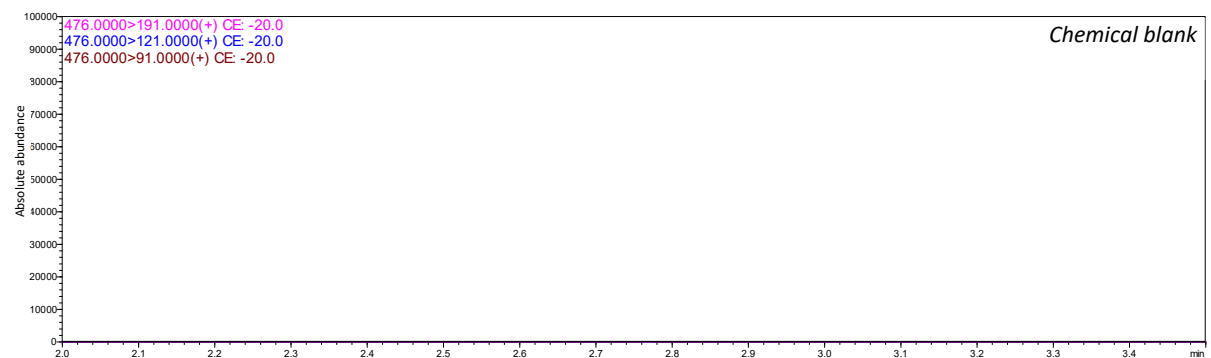

b)

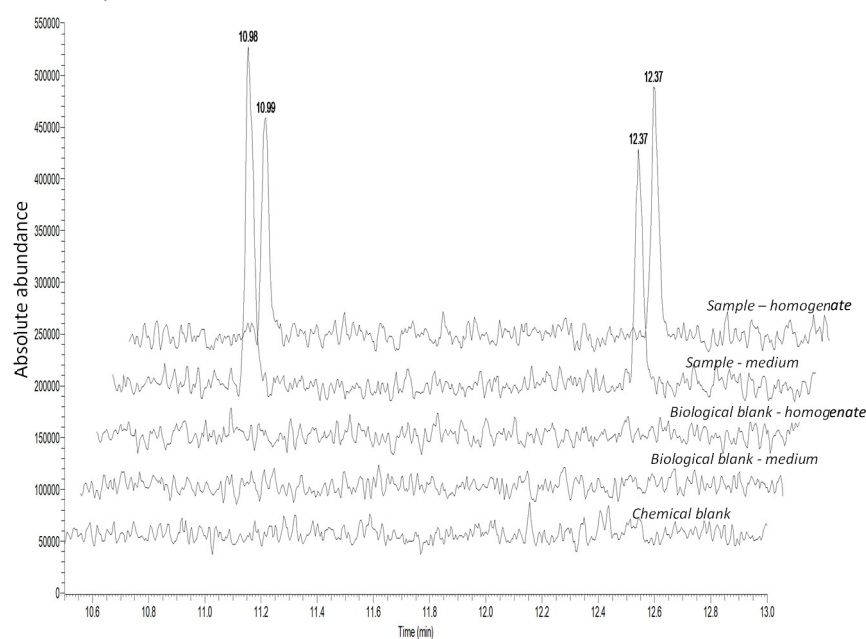

c)

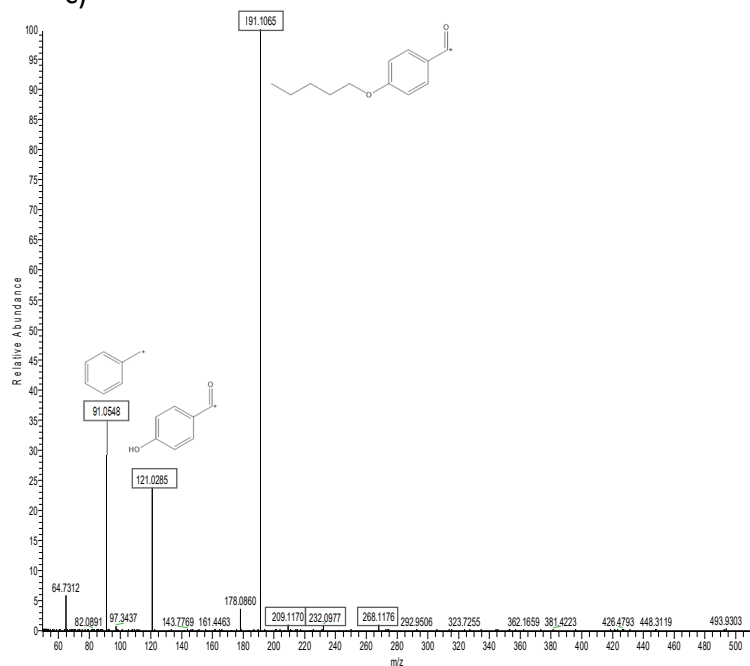

d)

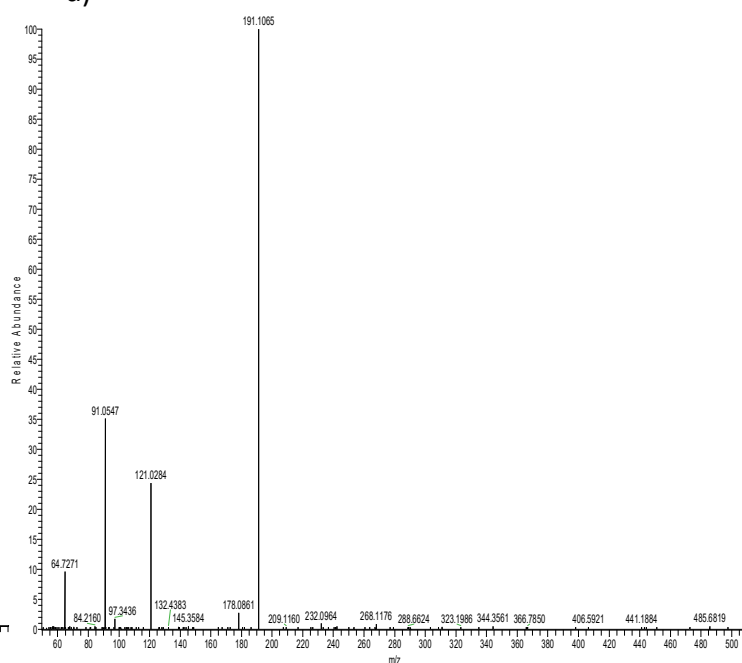

**Figure S2: UHPLC chromatograms and HRMS/MS spectra of BLK127-N-glc** (a) Representative UHPLC-MS/MS chromatograms of BLK127-N-glc with MRM\* in the samples incubated with BLK127 (*sample-homogenate* and *sample-medium*), blank biological samples (*biological blank-homogenate* and *biological blank-medium*) and *chemical blank*. (b) Comparison of extracted ion UHPLC-HRMS chromatograms for  $m/z$  476.2279  $[M-H]^+$  (BLK127-N-glc) from *H. contortus* (IRE strain female) in the samples and blank samples. (c) HRMS/MS spectrum of BLK127-N-glc in  $t_R$  10.99 min with the proposed structures of the main fragments. (d) HRMS/MS spectrum of BLK127-N-glc in  $t_R$  12.37 min.

\* multiple reaction monitoring
