# Supplementary material for: Assessing the Anthelmintic Candidates BLK127 and HBK4 for Their Efficacy on Haemonchus contortus Adults and Eggs, and Their Hepatotoxicity and Biotransformation
Source: Pharmaceutics. 2022 Mar 30;14(4):754. doi: 10.3390/pharmaceutics14040754 (PMC9024958; doi:10.3390/pharmaceutics14040754)
Supplement: Supplementary file 1 [file pharmaceutics-14-00754-s001.zip]

Archive with 7 entries (7 files):
- pharmaceutics-1649146-supplementary/Figure S1_UHPLC chromatograms and HRMS-MS spectrum of BLK127.pdf
- pharmaceutics-1649146-supplementary/Figure S2_UHPLC chromatograms and HRMS-MS spectra of BLK127-N-glc.pdf
- pharmaceutics-1649146-supplementary/Figure S3_UHPLC chromatograms and HRMS-MS spectrum of h-BLK127.pdf
- pharmaceutics-1649146-supplementary/Figure S4_UHPLC chromatograms and HRMS-MS spectra of BLK127-OH.pdf
- pharmaceutics-1649146-supplementary/Figure S5_ UHPLC chromatograms and comparison of HRMS spectra of BLK127-O-glc.pdf
- pharmaceutics-1649146-supplementary/Figure S6_UHPLC chromatograms and HRMS-MS spectrum of h-BLK127-gly. .pdf
- pharmaceutics-1649146-supplementary/Figure S7_HRMS-MS spectrum of IS from the standard.pdf
