# Supplementary figures and images for: Assessing the Anthelmintic Candidates BLK127 and HBK4 for Their Efficacy on Haemonchus contortus Adults and Eggs, and Their Hepatotoxicity and Biotransformation
Source: MDPI journal article supplement (doi:10.3390/pharmaceutics14040754), 2022-03-30

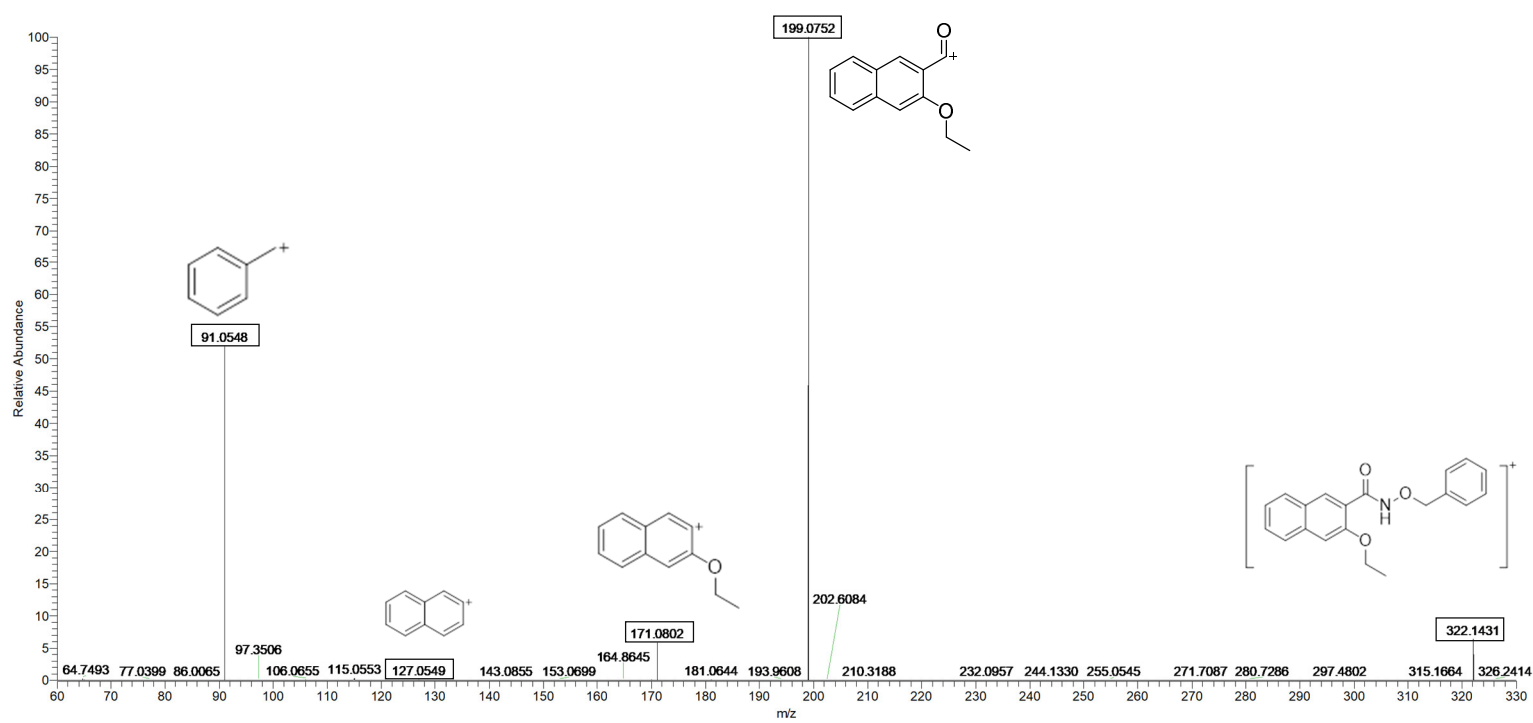

Figure S7: HRMS/MS spectrum of IS (m/z 322.1431 [M+H]<sup>+</sup>) from the standard.

Supplement: s1 [file s1]
